# Supplementary material for: New Insights into the Opioid Analgesic Profile of cis-(−)-N-Normetazocine-derived Ligands
Source: MDPI journal article supplement (doi:10.3390/molecules28124827), 2023-06-17
Supplement: s1 [file s1]

# Supporting Information

## New Insights into the Opioid Analgesic Profile of *cis*-(-)-*N*-Normetazocine-derived Ligands

Giuliana Costanzo <sup>1</sup>, Rita Turnaturi <sup>2</sup>, Carmela Parenti <sup>3</sup>, Salvatore Spoto <sup>3</sup>, Silvia Piana <sup>2</sup>, Maria Dichiarà <sup>2</sup>, Chiara Zagni <sup>2</sup>, Anna Rita Galambos <sup>4</sup>, Nariman Essmat <sup>4</sup>, Agostino Marrazzo <sup>2</sup>, Emanuele Amata <sup>2</sup>, Mahmoud Al-Khrasani <sup>4,\*</sup> and Lorella Pasquinucci <sup>2,\*</sup>

<sup>1</sup> Department of Biomedical and Biotechnological Sciences, University of Catania, Via Santa Sofia 97, 95123 Catania, Italy; giuliana.costanzo93@gmail.com

<sup>2</sup> Department of Drug and Health Sciences, Medicinal Chemistry Section, University of Catania, Viale A. Doria 6, 95125 Catania, Italy; rita.turnaturi@unict.it (R.T.); silviapiana@outlook.com (S.P.); mariadic.md@gmail.com (M.D.); chiara.zagni@unict.it (C.Z.); marrazzo@unict.it (A.M.); eamata@unict.it (E.A.)

<sup>3</sup> Department of Drug and Health Sciences, Section of Pharmacology and Toxicology, University of Catania, Viale A. Doria 6, 95125 Catania, Italy; cparenti@unict.it (C.P.); salvospoto12@icloud.com (S.S.)

<sup>4</sup> Department of Pharmacology and Pharmacotherapy, Faculty of Medicine, Semmelweis University, Nagyvárad tér 4, H-1089 Budapest, Hungary; galambos.anna@phd.semmelweis.hu (A.R.G.); nariman.gomaa@phd.semmelweis.hu (N.E.)

\* Correspondence: al-khrasani.mahmoud@med.semmelweis-univ.hu (M.A.-K.); lpasquin@unict.it (L.P.)

### Table of contents

|                                                              |         |
|--------------------------------------------------------------|---------|
| NMR and MS spectra of compound <b>3</b> . (Figures S1-S3)    | S3-S4   |
| NMR and MS spectra of compound <b>4</b> . (Figures S4-S6)    | S5-S6   |
| NMR and MS spectra of compound <b>5</b> . (Figures S7-S9)    | S7-S8   |
| NMR and MS spectra of compound <b>6</b> . (Figures S10-S12)  | S9-S10  |
| NMR and MS spectra of compound <b>7</b> . (Figures S13-S15)  | S11-S12 |
| NMR and MS spectra of compound <b>8</b> . (Figures S16-S18)  | S13-S14 |
| Table S1. Elemental analysis data for compounds <b>3-8</b> . | S15     |

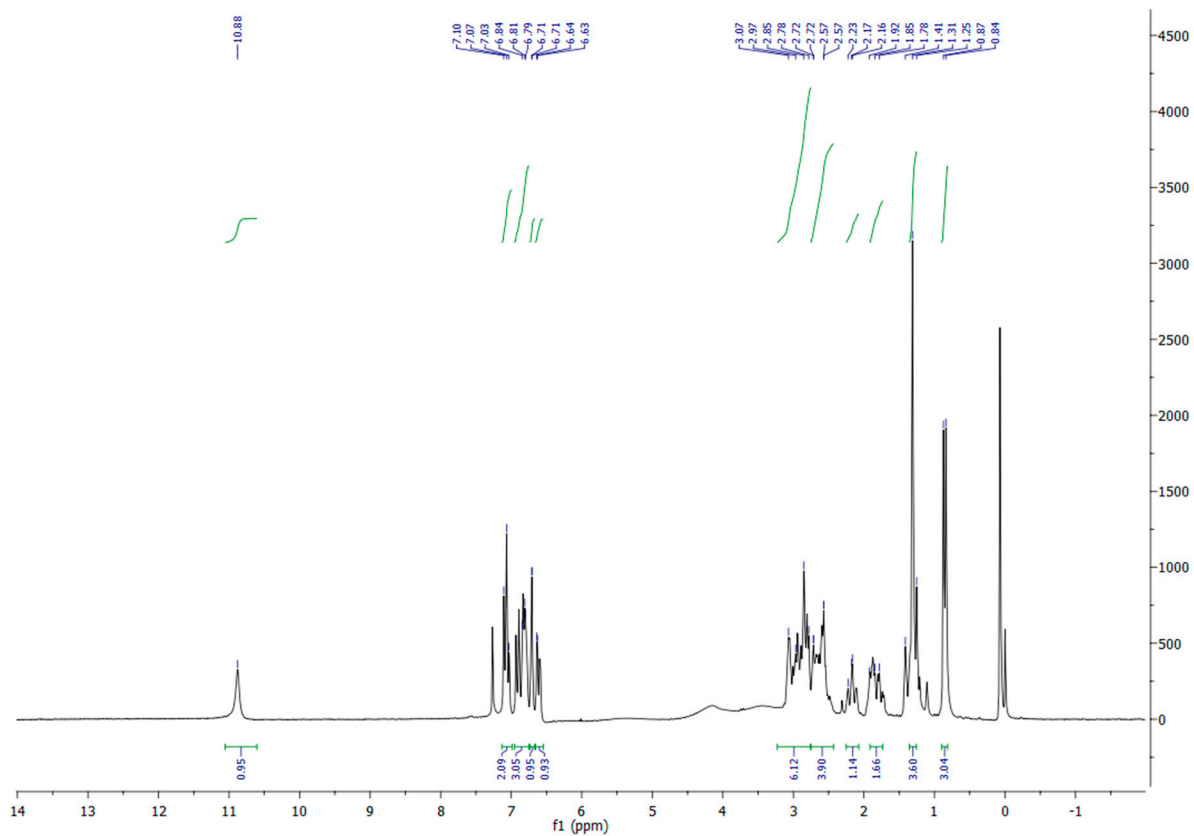

**Figure S1.** <sup>1</sup>H-NMR (200 MHz, CDCl<sub>3</sub>) spectrum of compound **3**.

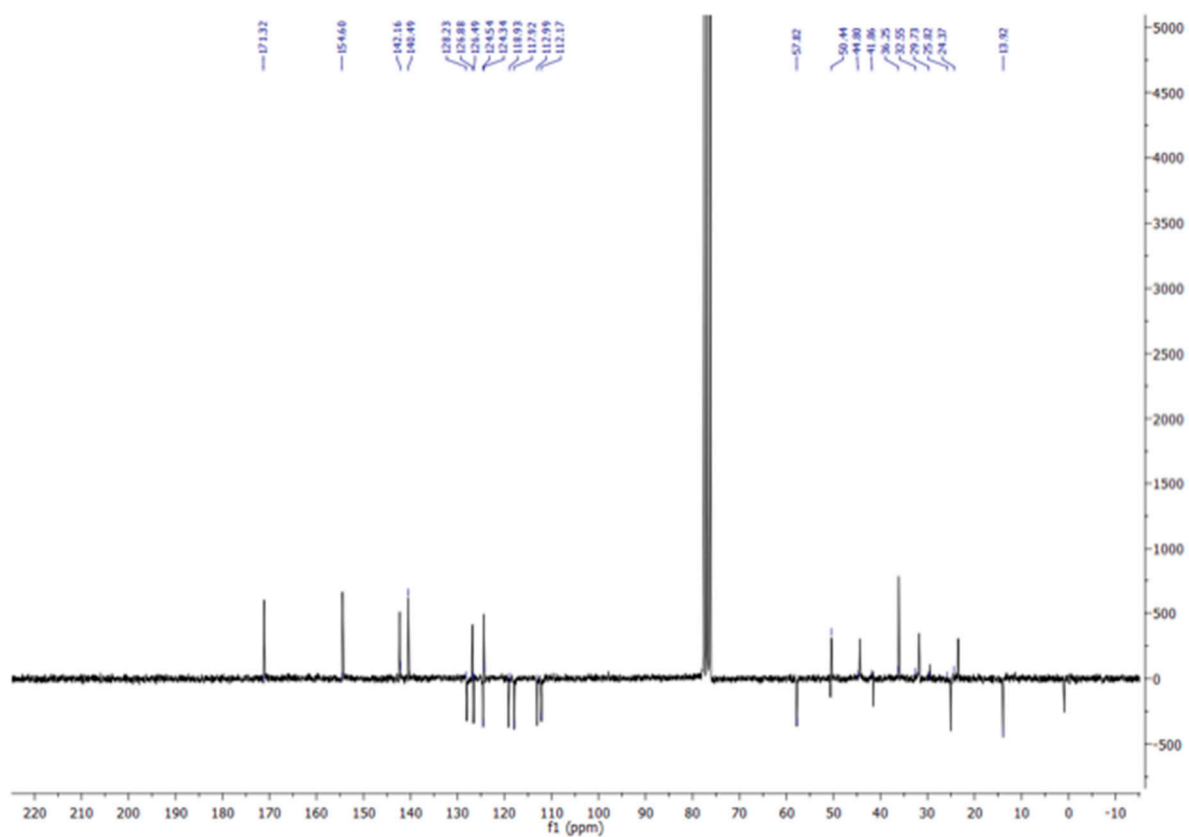

**Figure S2.** <sup>13</sup>C-NMR (200 MHz, CDCl<sub>3</sub>) spectrum of compound **3**.

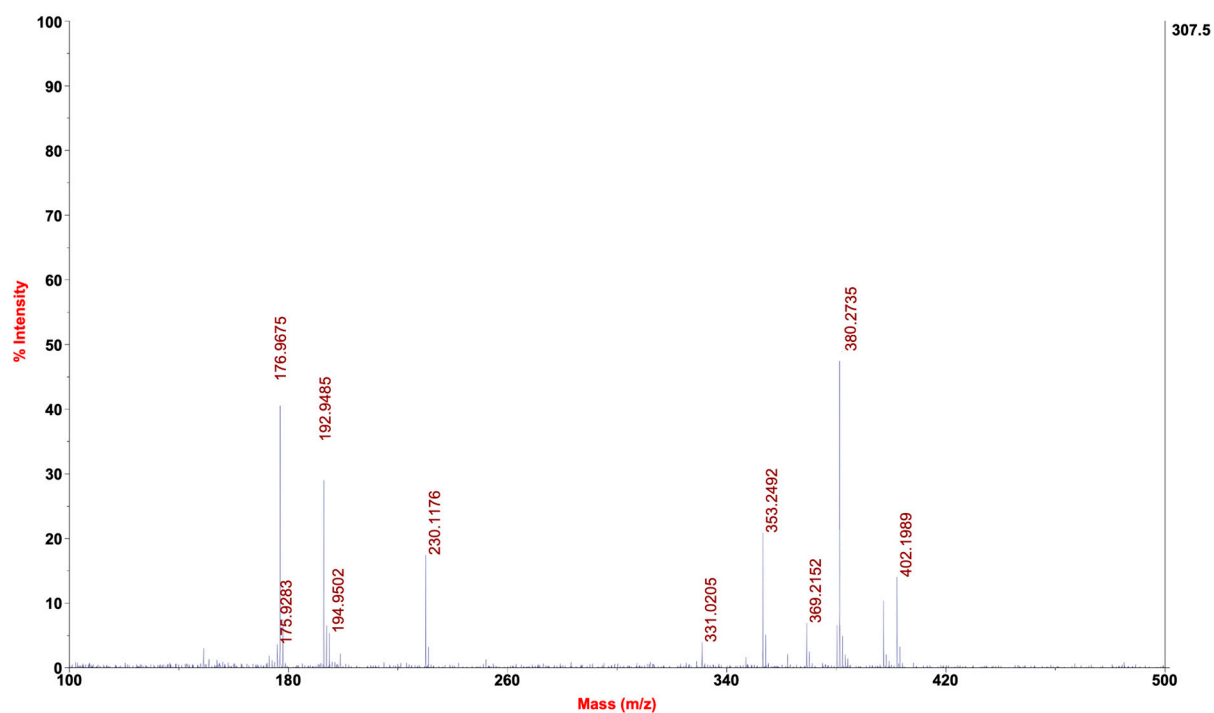

**Figure S3.** MALDI spectrum of compound **3**.

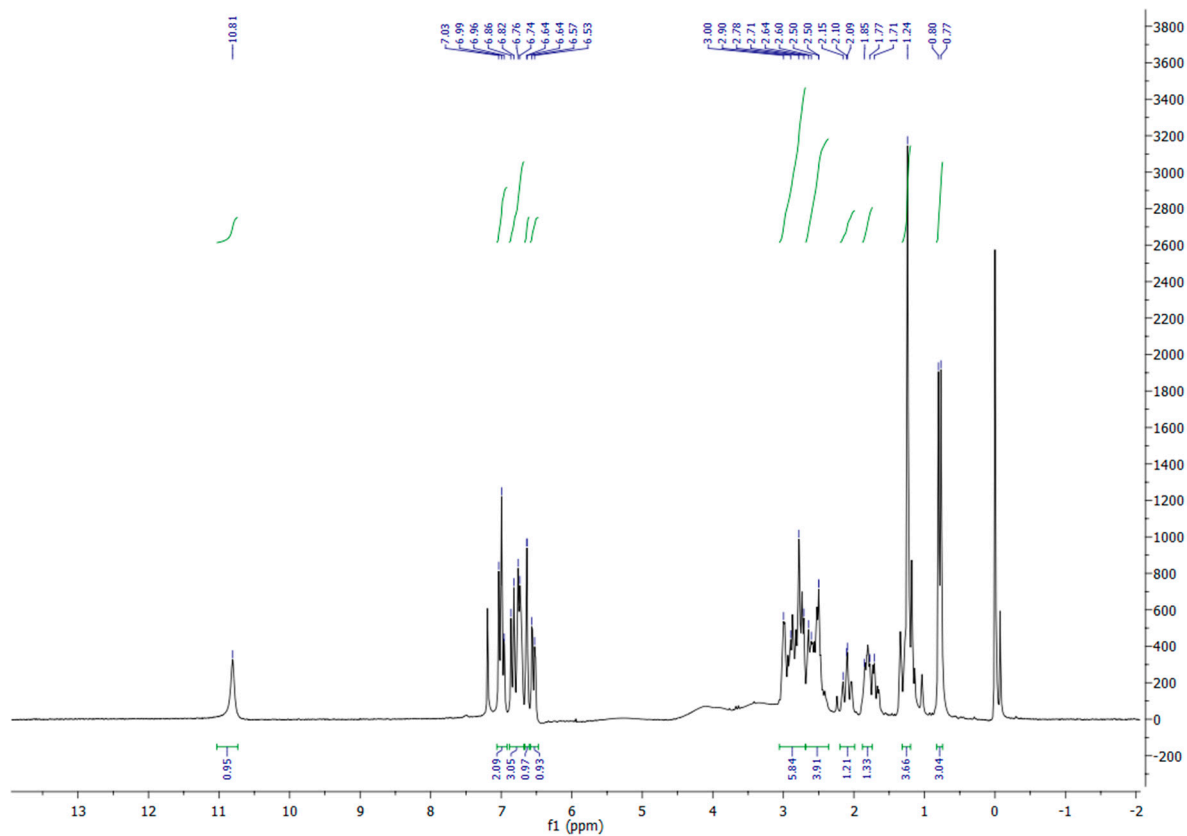

**Figure S4.** <sup>1</sup>H-NMR (200 MHz, CDCl<sub>3</sub>) spectrum of compound 4.

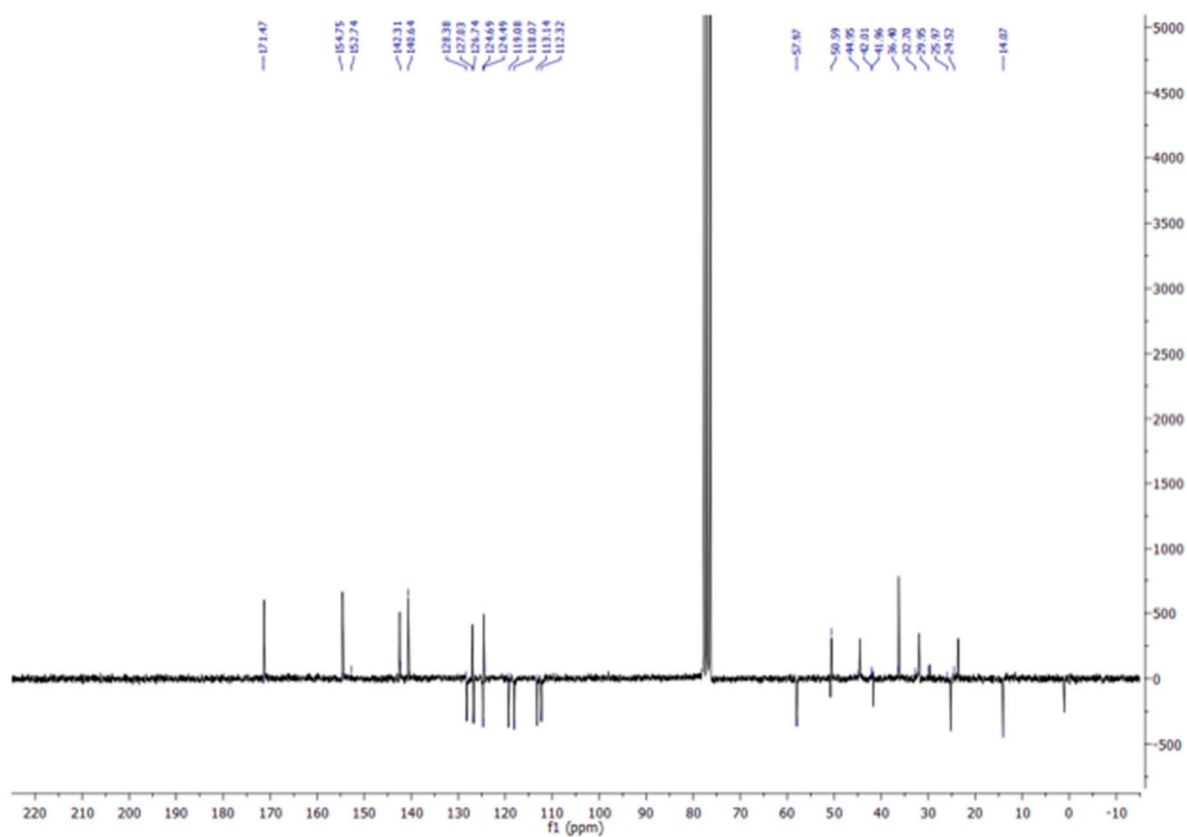

**Figure S5.** <sup>13</sup>C-NMR (200 MHz, CDCl<sub>3</sub>) spectrum of compound 4.

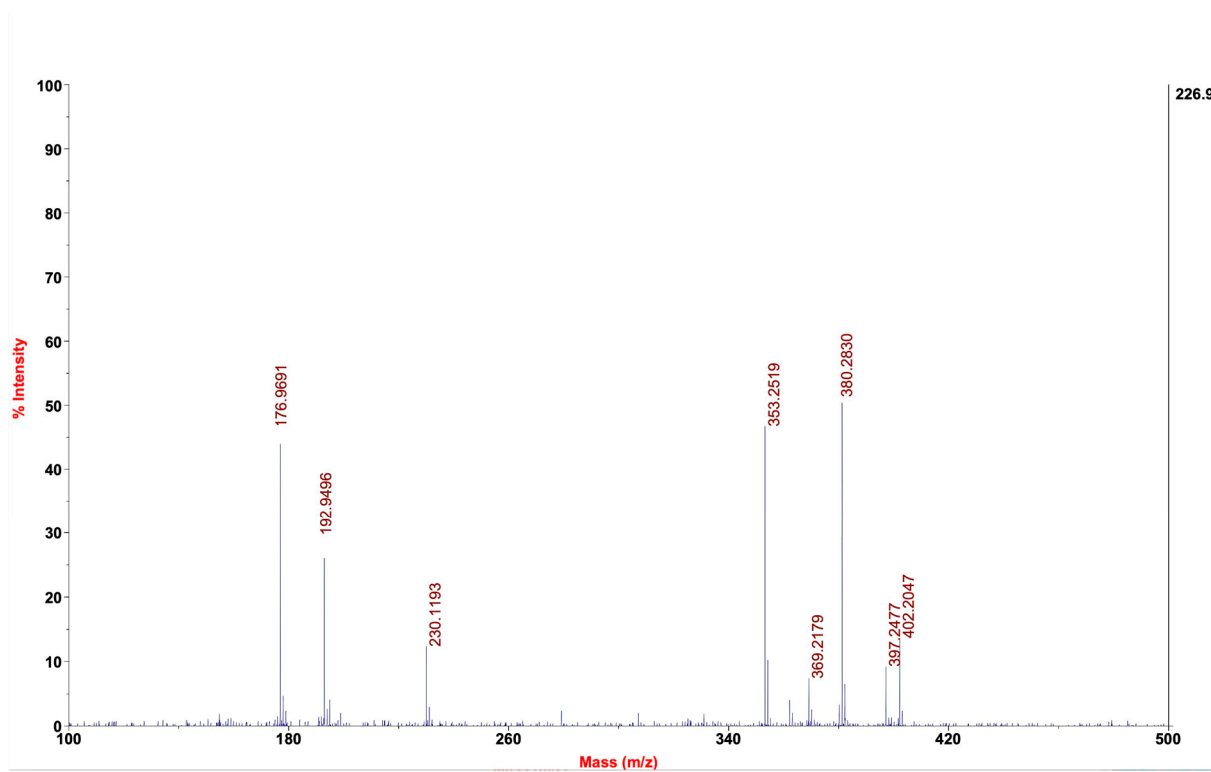

Figure S6. MALDI spectrum of compound 4.

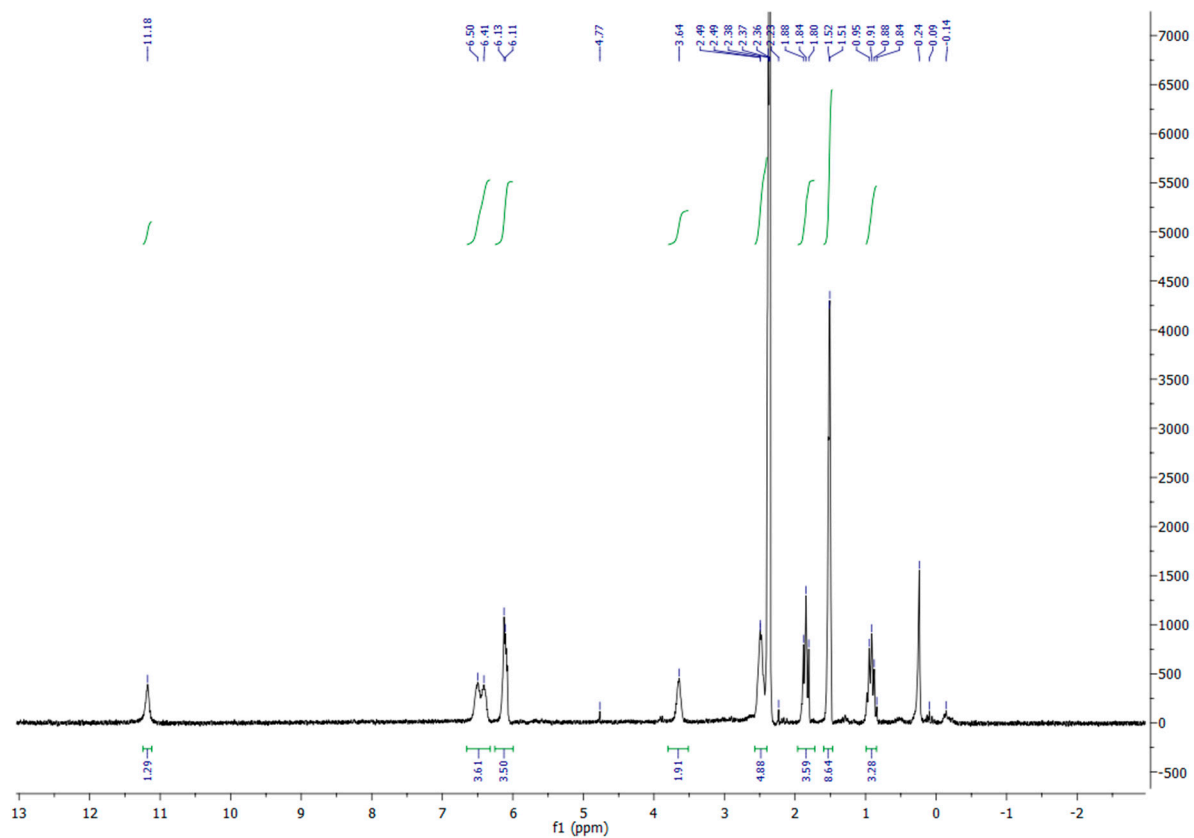

Figure S7.  $^1\text{H}$ -NMR (200 MHz,  $\text{DMSO}-d_6$ ) spectrum of compound **5**.

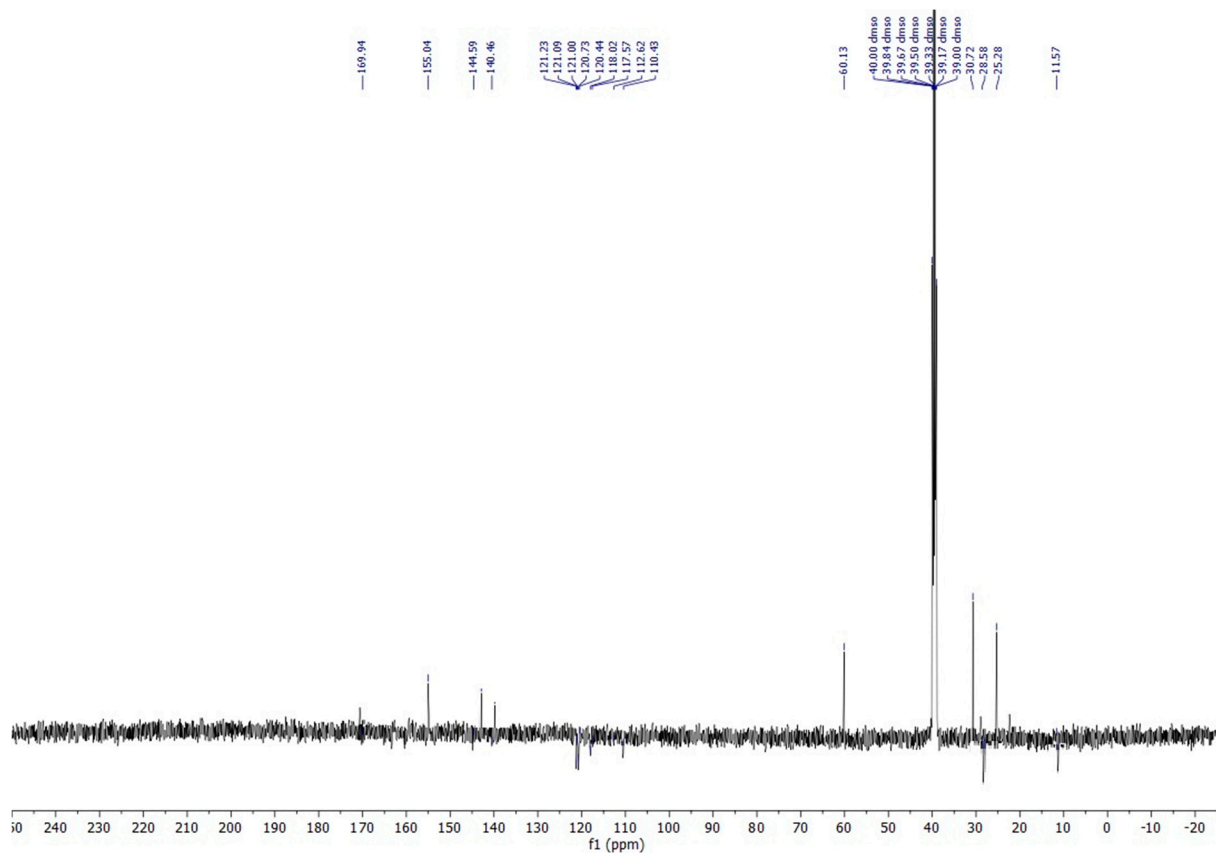

Figure S8.  $^{13}\text{C}$ -NMR (200 MHz,  $\text{DMSO}-d_6$ ) spectrum of compound **5**.

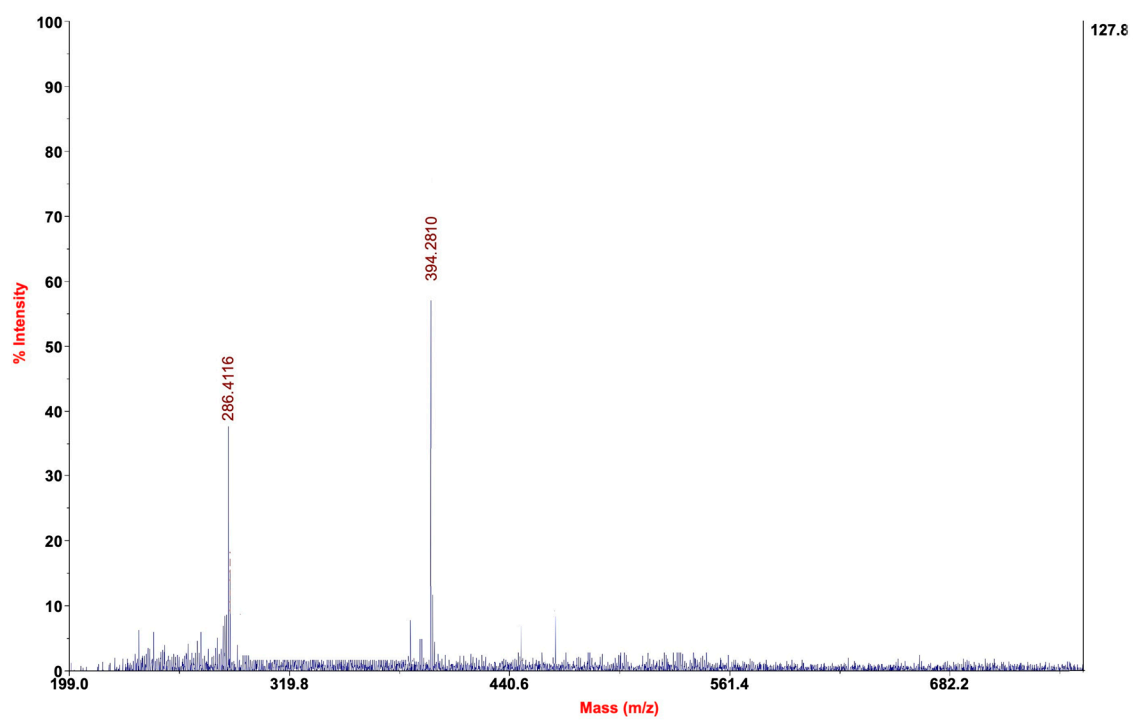

**Figure S9.** MALDI spectrum of compound **5**.

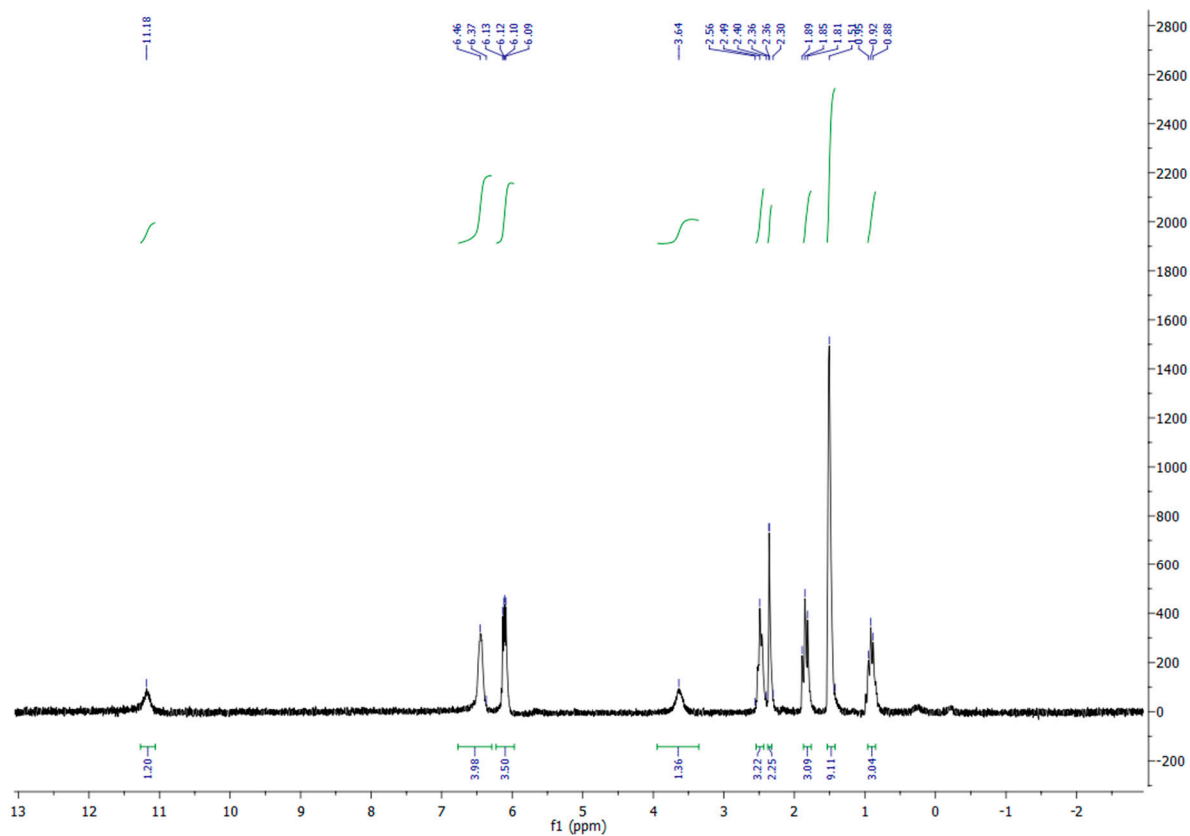

**Figure S10.** <sup>1</sup>H-NMR (200 MHz, DMSO-*d*<sub>6</sub>) spectrum of compound 6.

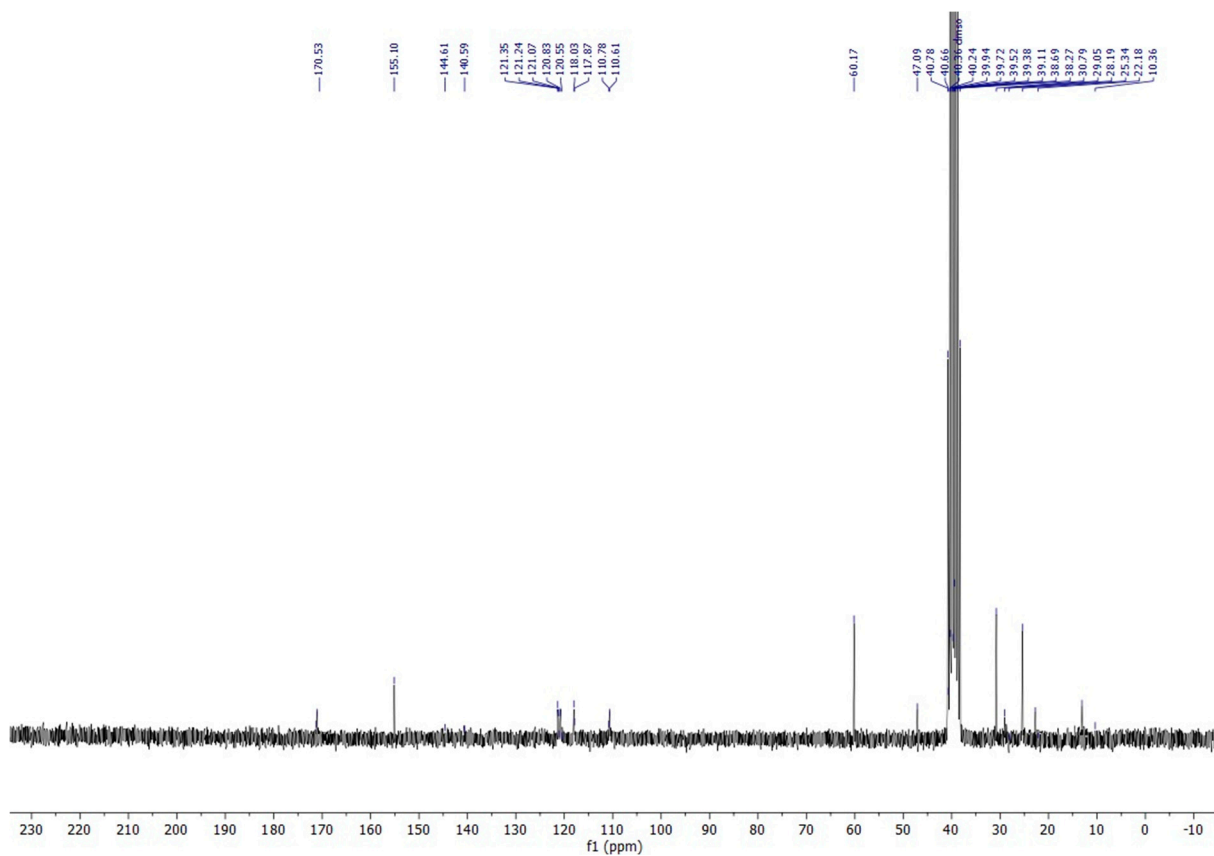

**Figure S11.** <sup>13</sup>C-NMR (200 MHz, DMSO-*d*<sub>6</sub>) spectrum of compound 6.





**Figure S12.** MALDI spectrum of compound **6**.

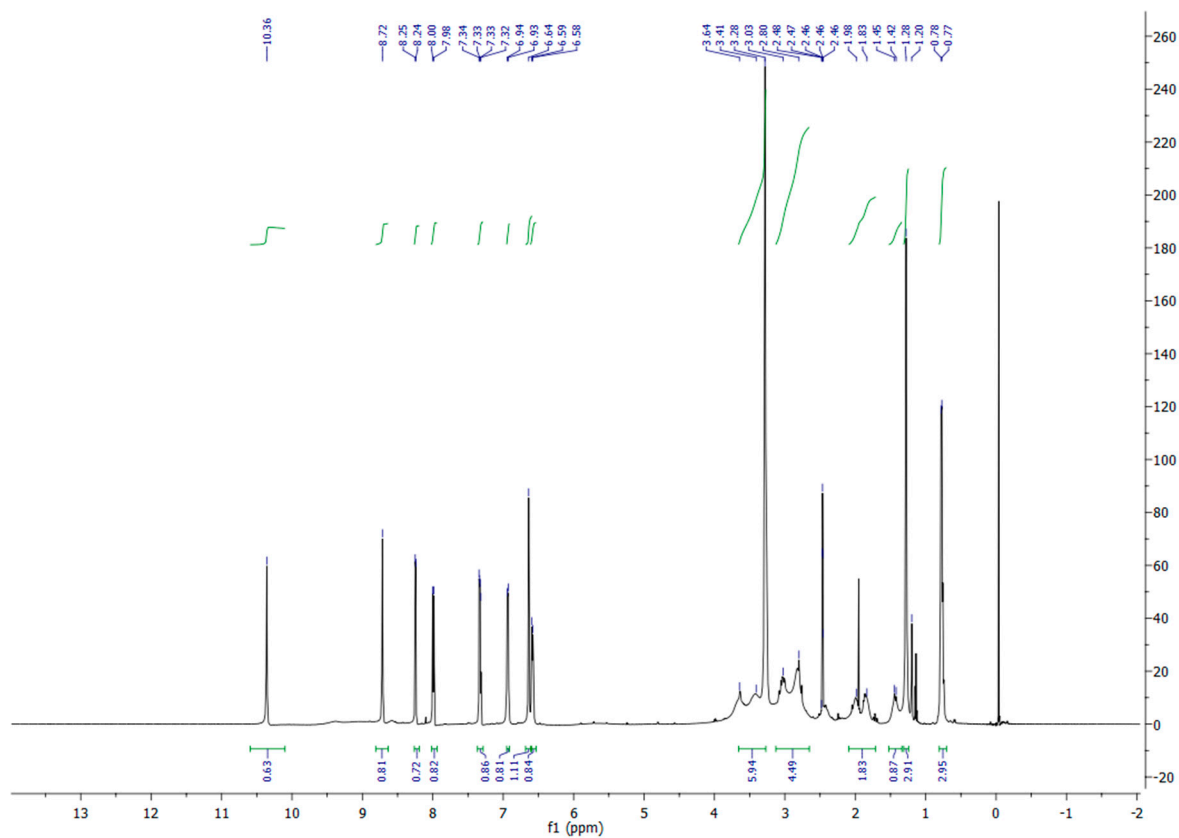

**Figure S13.** <sup>1</sup>H-NMR (200 MHz, DMSO-*d*<sub>6</sub>) spectrum of compound 7.

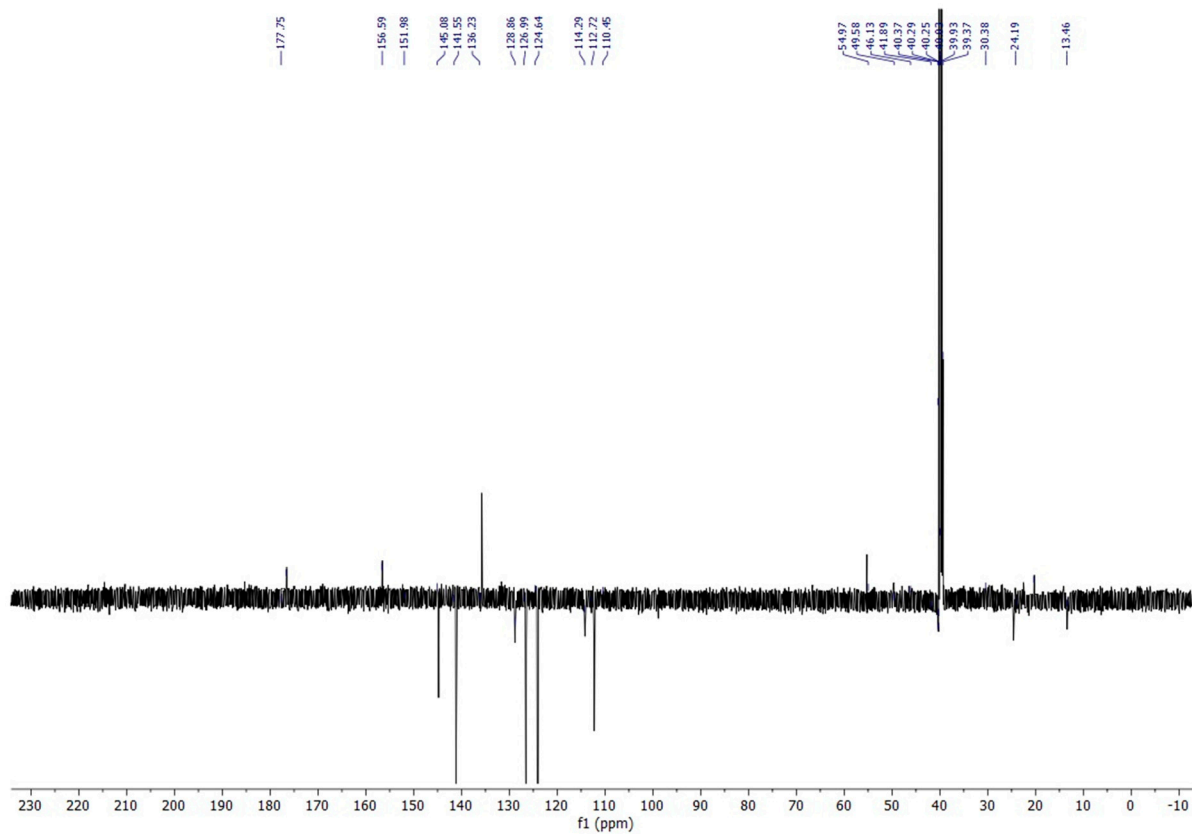

**Figure S14.** <sup>13</sup>C-NMR (200 MHz, DMSO-*d*<sub>6</sub>) spectrum of compound 7.

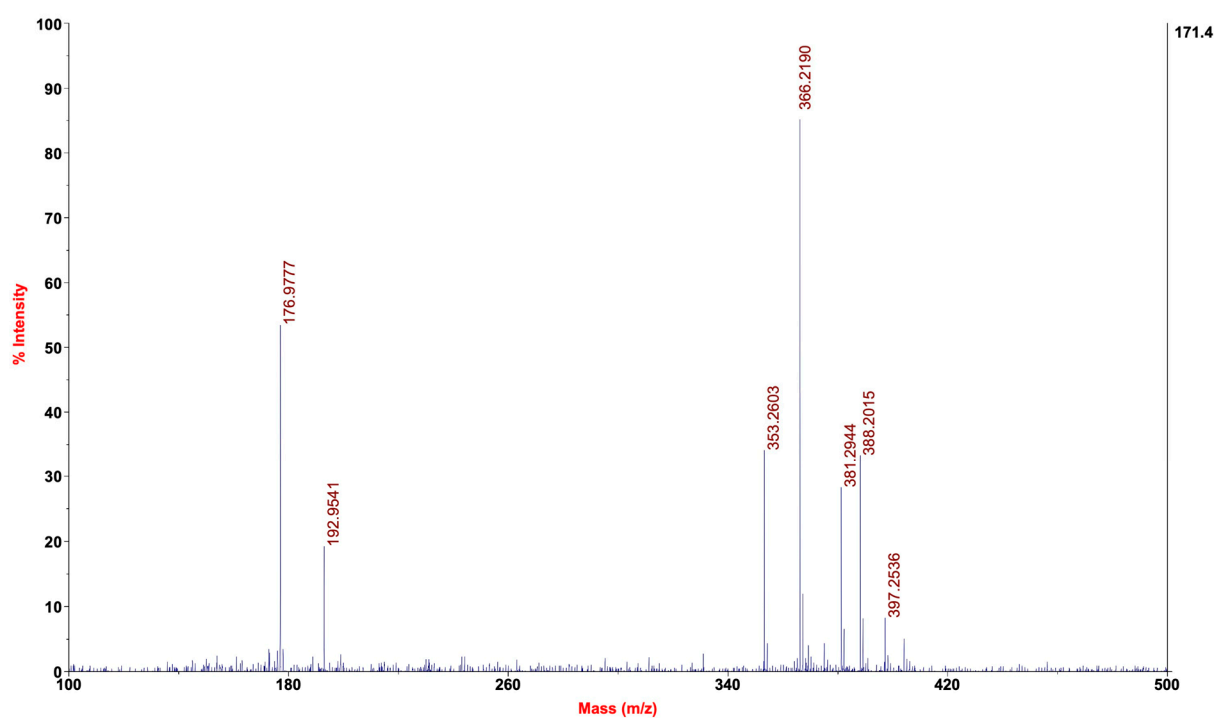

**Figure S15.** MALDI spectrum of compound **7**.

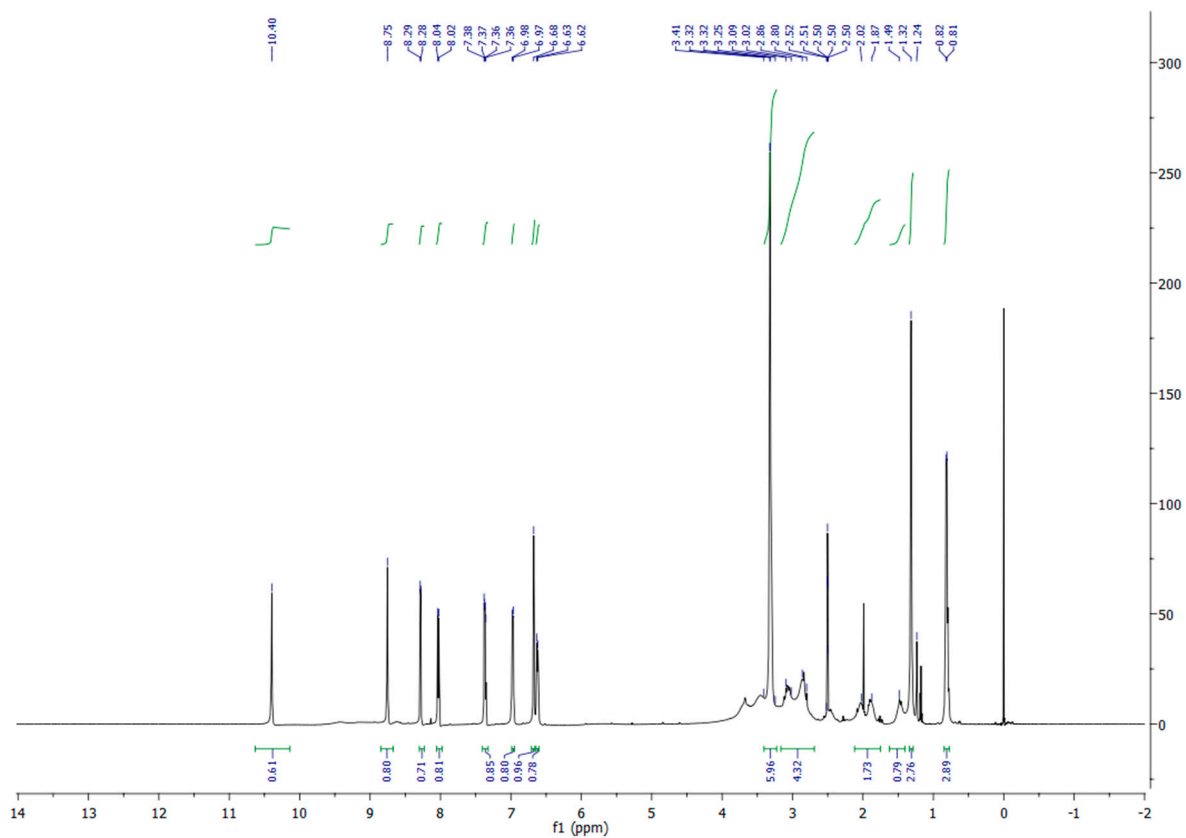

**Figure S16.** <sup>1</sup>H-NMR (200 MHz, DMSO-*d*<sub>6</sub>) spectrum of compound **8**.

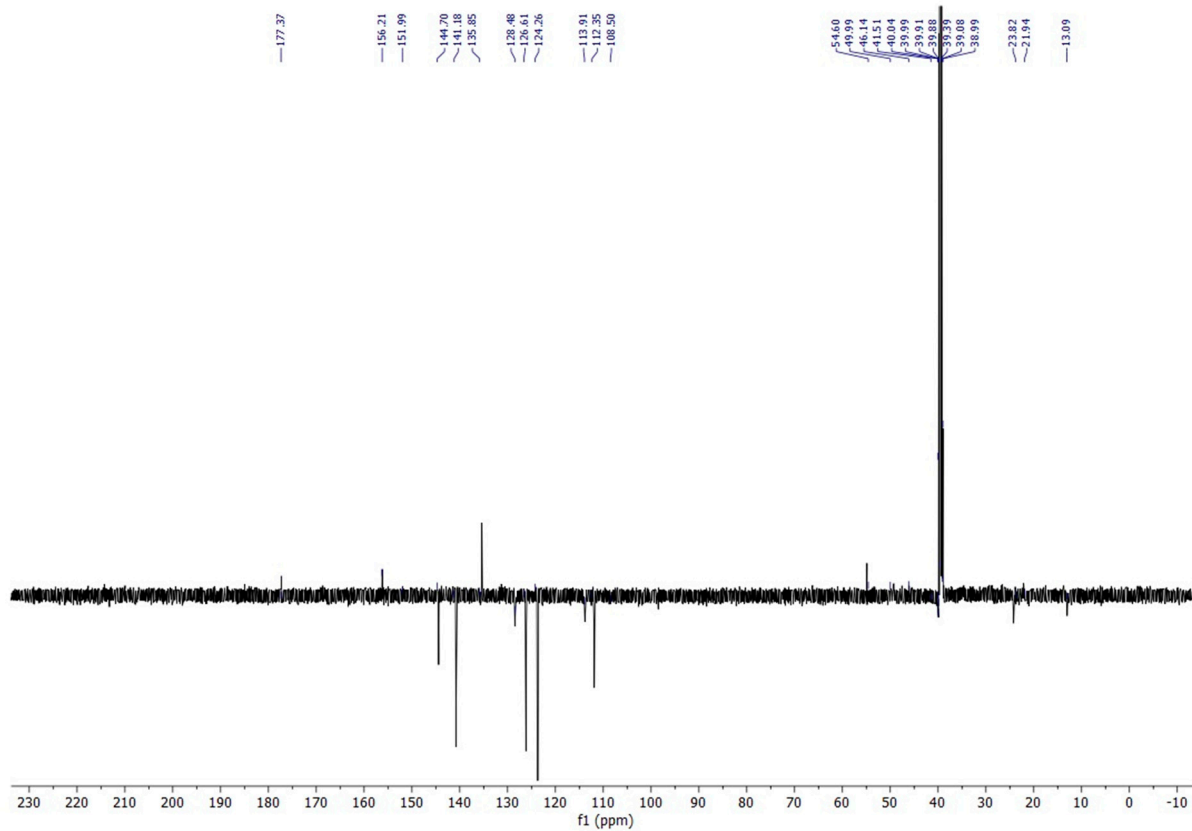

**Figure S17.** <sup>13</sup>C-NMR (200 MHz, DMSO-*d*<sub>6</sub>) spectrum of compound **8**.

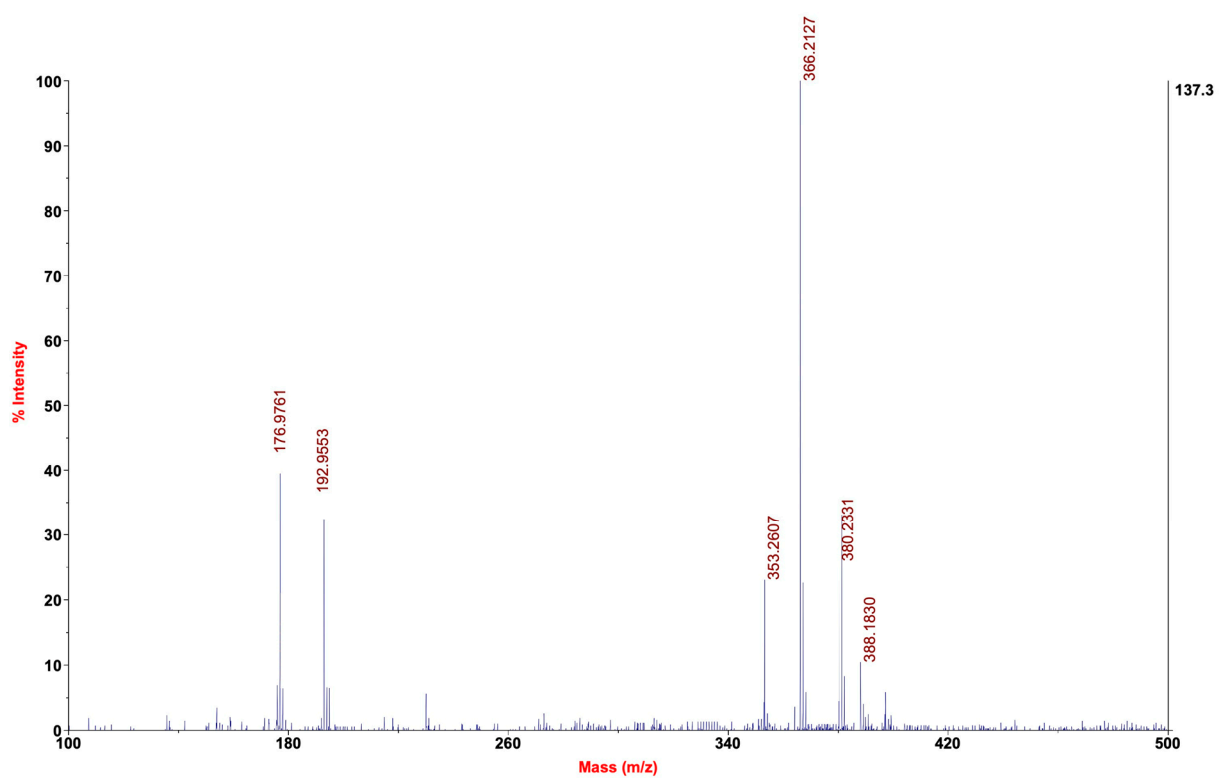

**Figure S18.** MALDI spectrum of compound **8**.

**Table S1.** Elemental analysis data for compounds **3–8**.

|          |                                                               |        | Calcd |      |       | Found |      |       |
|----------|---------------------------------------------------------------|--------|-------|------|-------|-------|------|-------|
| Compd    | Formula                                                       | MW     | C     | H    | N     | C     | H    | N     |
| <b>3</b> | C <sub>23</sub> H <sub>29</sub> N <sub>3</sub> O <sub>2</sub> | 379.49 | 72.79 | 7.70 | 11.07 | 72.82 | 7.73 | 11.04 |
| <b>4</b> | C <sub>23</sub> H <sub>29</sub> N <sub>3</sub> O <sub>2</sub> | 379.49 | 72.79 | 7.70 | 11.07 | 72.78 | 7.74 | 11.02 |
| <b>5</b> | C <sub>24</sub> H <sub>31</sub> N <sub>3</sub> O <sub>2</sub> | 393.52 | 73.25 | 7.94 | 10.68 | 73.27 | 7.96 | 10.63 |
| <b>6</b> | C <sub>24</sub> H <sub>31</sub> N <sub>3</sub> O <sub>2</sub> | 393.52 | 73.25 | 7.94 | 10.68 | 73.23 | 7.97 | 10.65 |
| <b>7</b> | C <sub>22</sub> H <sub>27</sub> N <sub>3</sub> O <sub>2</sub> | 365.46 | 72.30 | 7.45 | 11.50 | 72.32 | 7.47 | 11.48 |
| <b>8</b> | C <sub>22</sub> H <sub>27</sub> N <sub>3</sub> O <sub>2</sub> | 365.46 | 72.30 | 7.45 | 11.50 | 72.34 | 7.45 | 11.46 |
